# Supplementary material for: Field performance of a low-cost sensor in the monitoring of particulate matter in Santiago, Chile
Source: PubMed Central journal article supplement (PMC7010625; doi:10.1007/s10661-020-8118-4), 2020-02-10
Supplement: 10661_2020_8118_MOESM1_ESM.pdf [file 10661_2020_8118_MOESM1_ESM.pdf]

## *Supplementary Material*

### **Field performance of a low-cost IoT sensor in the monitoring of particulate matter in Santiago, Chile**

**Matías Tagle<sup>1</sup>, Francisca Rojas<sup>1</sup>, Felipe Reyes<sup>1</sup>, Yeanice Vásquez<sup>1</sup>, Fredrik Hallgren<sup>2</sup>, Jenni Linden<sup>2</sup>, Dimitar Kolev<sup>3</sup>, Ågot Watne<sup>4</sup>, Pedro Oyola<sup>1\*</sup>**

Supplementary Table 1. Connection pins between the different components of the IoT sensor.

| Wire color | SDS011 | ESP8266/<br>Node MCU | BME280 | Function                            |
|------------|--------|----------------------|--------|-------------------------------------|
| Green      | TXD    | D1                   |        | Connects SDS011 to ESP8266/Node MCU |
| Yellow     | RXD    | D2                   |        | Connects ESP8266/Node MCU to SDS011 |
| Black      | GND    | G                    |        | Connects to ground                  |
| Red        | 5 v    | VU                   |        | Energizes with 5 volts              |
| Orange     |        | 3 V                  | VCC    | Energizes with 3 volts              |
| White      |        | G                    | GND    | Connects to ground                  |
| Purple     |        | D4                   | SCL    | Sends data by I2C protocol          |
| Blue       |        | D3                   | SDA    | Sends data by I2C protocol          |

---

\* Corresponding author. Tel: (562) 2247 9650

E-mail address: poyola@cmmolina.cl

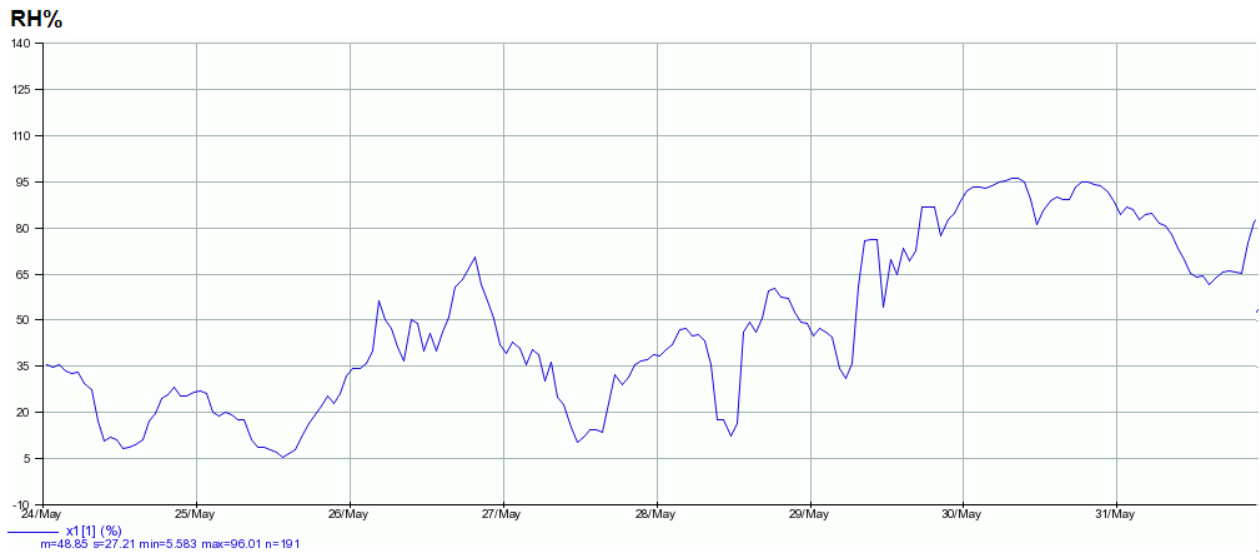

**Supplementary Figure 1.** Relative humidity at the Las Condes regulatory station during the short-term monitoring campaign.

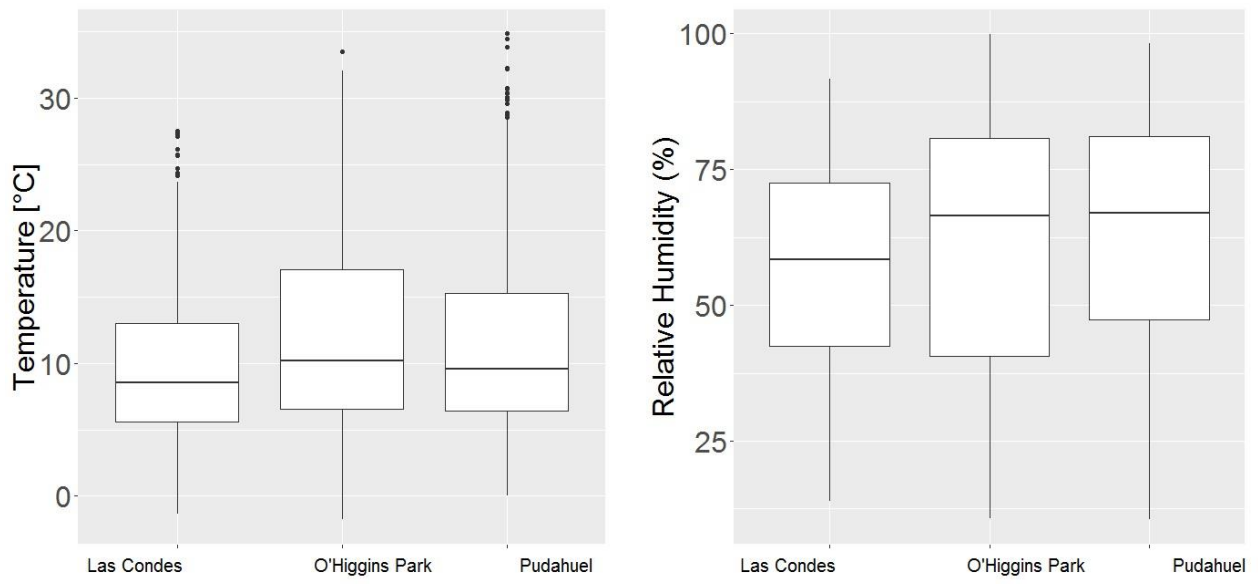

**Supplementary Figure 2.** Temperature and Relative Humidity at the three regulatory monitoring stations during the long-term monitoring campaign.

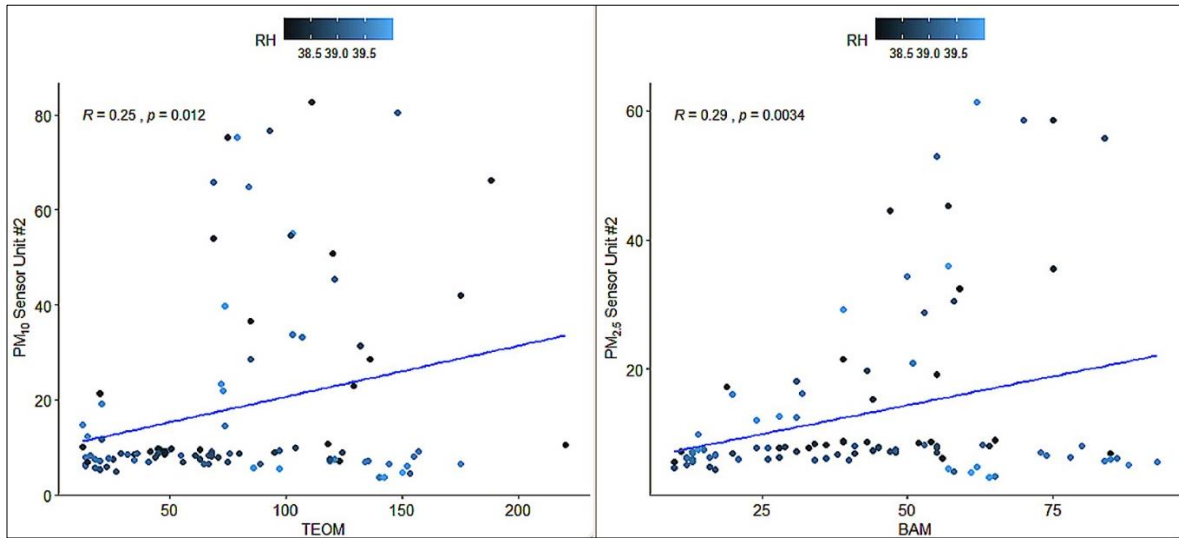

**Supplementary Figure 3.** Correlation of the 1-h averages reported by the SDS011 sensor and the reference monitor (TEOM and BAM) for RH range 38-40% informed by the BME280 sensor at O'Higgins Park.
